# Supplementary material for: GGPS1 ‐associated muscular dystrophy with and without hearing loss
Source: Ann Clin Transl Neurol. 2022 Jul 23;9(9):1465–74. doi: 10.1002/acn3.51633 (PMC9463955; doi:10.1002/acn3.51633)
Supplement: Supplementary file 3 — Figure S3 Expression of Ggps1 in the mouse cochlea through single‐cell RNA‐sequencing data. [file ACN3-9-1465-s003.pdf]

## E14 mouse, cochlear epithelium

*Ggpsi*

cell type

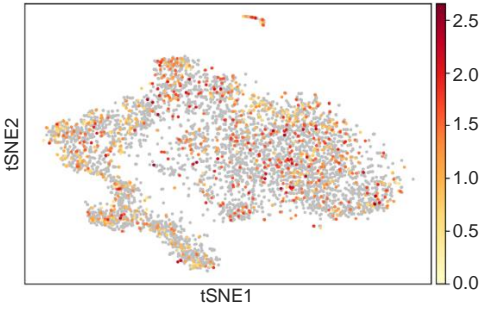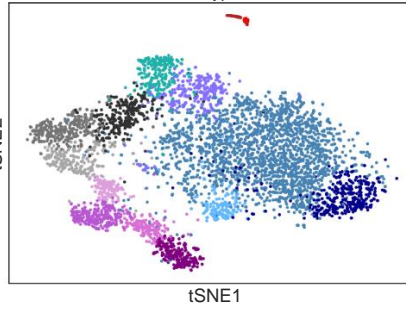

- Greater epithelial ridge
- Greater epithelial ridge expressing *Hmgn2*
- Inner hair cells
- Interdental cells
- Lesser epithelial ridge cells expressing *Bmp4* c1
- Lesser epithelial ridge cells expressing *Bmp4* c2
- Lesser epithelial ridge cells expressing *Fst*
- Lateral prosensory cells
- Medial prosensory cells
- Outer hair cells
- Cells expressing *Oc90* and *Otoa*
- Cells expressing *Oc90* and *Sparcl1*
- Cells expressing *Oc90* c1
- Cells expressing *Oc90* c2

## P1 mouse, cochlear epithelium

*Ggpsi*

cell type

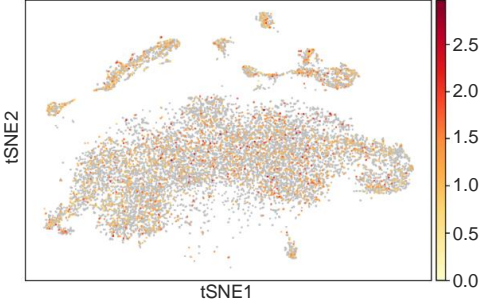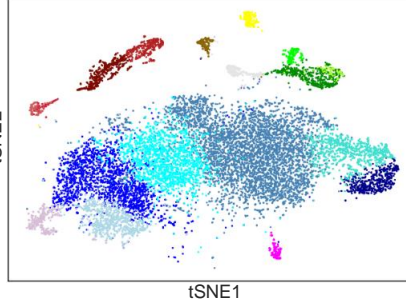

- Deiters' cells rows 1 and 2
- Deiters' cells row 3
- Hensen cells
- Inner hair cells
- Inner pillar cells
- Inner phalangeal cells
- Inner sulcus cells
- Interdental cells
- Lateral greater epithelial ridge cells, group 1
- Lateral greater epithelial ridge cells, group 2
- Lateral greater epithelial ridge cells, group 3
- Medial greater epithelial ridge cells
- Outer hair cells
- Outer pillar cells
- Outer sulcus cells
- Cells expressing *Oc90*
- Less mature developing inner hair cells
- Less mature developing outer hair cells

## P7 mouse, cochlear epithelium

*Ggpsi*

cell type

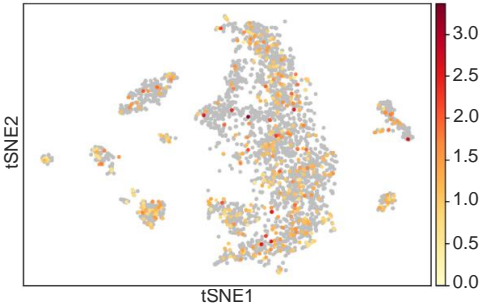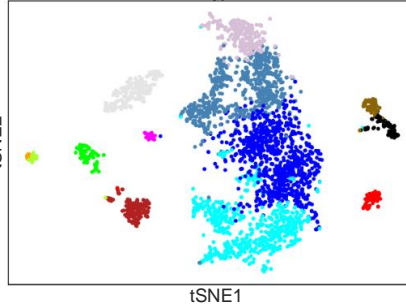

- Basilar membrane cells
- Deiter cells
- Hensen cells
- Inner hair cells
- Inner pillar cells
- Inner sulcus cells
- Lateral greater epithelial ridge cells
- Medial greater epithelial ridge cells
- Medial lateral greater epithelial ridge cells
- Outer hair cells
- Outer pillar cells
- Outer sulcus cells
- Glial cells?
